# Supplementary material for: Ethambutol induces impaired autophagic flux and apoptosis in the retina
Source: Oxford University Press journal article supplement (doi:10.1242/dmm.019737), 2015-01-01
Supplement: dmm019737supp.pdf [file dmm019737supp.pdf]

## Supplementary Figures

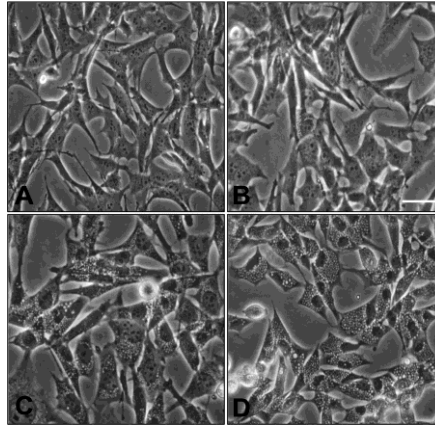

**Supplementary Figure 1. EMB induces cytoplasmic vacuole formation in RGC-5 cells.** RGCs were treated with (A) DMSO, (B) 4 mM EMB, (C) 6 mM EMB and (D) 12 mM EMB for 4 h.

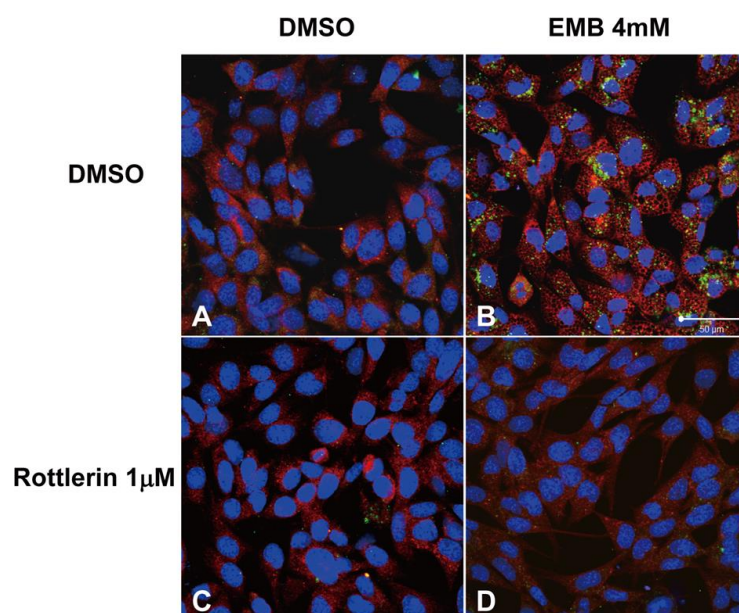

**Supplementary Figure 2. EMB treatment induces lysosomal dilation in RGC-5 cells.** Confocal microscopy images of LysoTracker (red) and immunofluorescence staining of endogenous LC3 (green) in RGC-5 cells after treating with DMSO (A), 4 mM EMB (B), DMSO and 1  $\mu$ M Rottlerin (C) or 4 mM EMB and 1  $\mu$ M rottlerin (D) for 4 h. The number of cytoplasmic vacuoles that formed after EMB treatment corresponded closely with the number of dilated lysosomes and the increased number of LC3-positive puncta in RGC-5 cells. Rottlerin treatment (1  $\mu$ M) inhibited EMB-induced vacuole formation and decreased the number of LC3-positive puncta. Scale bar, 50  $\mu$ m.

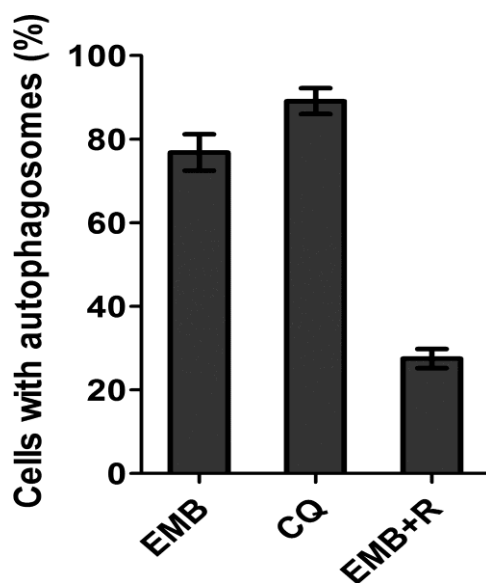

**Supplementary Figure 3. Quantitative analysis of autophagosome puncta**

**in RGC-5 cells.** At least 100 cells were examined for each experimental group.

Data shown are the means  $\pm$  SEM of three independent experiments.
